# Supplementary material for: Newborn Screening with (C16 + C18:1)/C2 and C14/C3 for Carnitine Palmitoyltransferase II Deficiency throughout Japan Has Revealed C12/C0 as an Index of Higher Sensitivity and Specificity
Source: MDPI journal article supplement (doi:10.3390/ijns9040062), 2023-10-27
Supplement: s1 [file s1]

**Table S2.** Concentrations of acylcarnitines and free carnitine (C0) in dried blood specimens from newborns.

| Case ID | Acylcarnitine Levels in Dried Blood Specimen from Newborns (nmol/mL) |       |      |        |      |       |       |       |       |       |       |      |       |       |
|---------|----------------------------------------------------------------------|-------|------|--------|------|-------|-------|-------|-------|-------|-------|------|-------|-------|
|         | C16                                                                  | C18:1 | C18  | C16-OH | C14  | C14:1 | C12   | C10   | C8    | C6    | C4    | C3   | C2    | C0    |
| S-01    | 3.45                                                                 | 1.68  | 1.47 | 0.041  | 0.57 | 0.14  | 0.46  | 0.29  | 0.09  | 0.04  | 0.16  | 0.66 | 6.81  | 25.31 |
| N-01    | 3.46                                                                 | 2.57  | 1.71 | 0.04   | 0.60 | 0.11  | 0.98  | 0.25  | 0.08  | ND    | ND    | 0.19 | 2.86  | 13.88 |
| N-02    | 12.20                                                                | 6.05  | 4.13 | 0.08   | 1.32 | 0.14  | 0.55  | 0.18  | 0.07  | 0.03  | 0.12  | 0.31 | 5.60  | 14.90 |
| N-03    | 13.07                                                                | 5.92  | 4.41 | 0.25   | 1.05 | 0.38  | 0.46  | 0.34  | 0.16  | 0.10  | 0.10  | 0.33 | 13.60 | 19.50 |
| N-04    | 1.85                                                                 | 0.96  | 0.73 | UD     | 0.26 | 0.07  | 0.17  | 0.08  | 0.03  | 0.01  | 0.03  | 0.12 | 2.46  | 11.08 |
| N-05    | 5.07                                                                 | 1.54  | 1.24 | 0.08   | 0.41 | 0.13  | 0.16  | 0.23  | 0.08  | 0.04  | 0.06  | 0.09 | 4.01  | 10.89 |
| N-06    | 3.37                                                                 | 2.31  | 1.10 | 0.031  | 0.74 | 0.16  | 0.60  | 0.22  | 0.07  | 0.01  | 0.07  | 0.43 | 5.16  | 8.32  |
| N-07    | 9.93                                                                 | 5.25  | 3.27 | 0.06   | 1.75 | ND    | 1.04  | 0.29  | 0.06  | 0.02  | ND    | 0.31 | 4.40  | 18.50 |
| N-08    | 1.07                                                                 | 0.90  | 0.57 | 0.009  | 0.21 | 0.05  | 0.32  | 0.09  | 0.07  | 0.02  | 0.09  | 0.30 | 4.20  | 11.80 |
| N-09    | 4.47                                                                 | 2.81  | 2.18 | 0.032  | 0.64 | 0.069 | 0.389 | 0.107 | 0.035 | ND    | ND    | 0.57 | 5.56  | 24.05 |
| N-10    | 10.60                                                                | 4.45  | 1.40 | 0.10   | ND   | 0.20  | 1.00  | 0.30  | 0.10  | 0.02  | ND    | 0.20 | 5.00  | 12.00 |
| N-11    | 2.76                                                                 | 1.25  | 0.75 | 0.029  | 0.36 | 0.09  | 0.20  | 0.12  | 0.10  | 0.02  | 0.09  | 0.40 | 4.60  | 12.50 |
| N-12    | 4.98                                                                 | 3.22  | 1.96 | 0.04   | 0.66 | 0.12  | 0.32  | 0.12  | 0.03  | 0.02  | 0.04  | 0.08 | 2.51  | 11.55 |
| N-13    | 1.80                                                                 | 1.20  | 0.55 | 0.03   | 0.54 | 0.05  | 0.50  | 0.17  | 0.04  | 0.02  | 0.07  | 0.54 | 5.44  | 18.41 |
| N-14    | 17.20                                                                | 5.41  | 4.28 | 0.186  | 1.40 | 0.17  | 0.34  | 0.09  | 0.03  | 0.02  | 0.05  | 0.29 | 3.58  | 10.60 |
| N-15    | 17.80                                                                | 6.91  | 4.76 | 0.225  | 1.75 | 0.13  | 0.855 | 0.125 | 0.04  | 0.002 | 0.051 | 0.21 | 5.37  | 15.97 |
| N-16    | 1.29                                                                 | 1.00  | 0.54 | 0.02   | 0.50 | 0.06  | 0.49  | 0.11  | 0.04  | 0.02  | 0.11  | 0.47 | 4.09  | 17.34 |
| N-17    | 1.38                                                                 | 1.23  | 0.60 | 0.02   | 0.30 | 0.06  | 0.73  | 0.36  | 0.11  | ND    | ND    | 0.17 | 3.00  | 9.29  |
| N-18    | 0.89                                                                 | 0.59  | 0.39 | 0.013  | 0.20 | 0.05  | 0.20  | 0.07  | 0.02  | 0.01  | 0.05  | 0.20 | 2.96  | 10.75 |
| N-19    | 2.62                                                                 | 1.03  | 0.65 | 0.028  | 0.33 | 0.066 | 0.228 | 0.063 | 0.031 | 0.013 | 0.046 | 0.27 | 4.19  | 9.69  |
| N-20    | 1.26                                                                 | 1.17  | 0.60 | 0.015  | 0.28 | 0.04  | 0.52  | 0.14  | 0.05  | 0.01  | 0.10  | 0.19 | 3.61  | 10.65 |
| N-21*   | 2.04                                                                 | 0.72  | 0.50 | 0.006  | 0.10 | 0.05  | 0.09  | 0.08  | 0.08  | ND    | ND    | 0.47 | 6.67  | 8.74  |
| N-22    | 1.15                                                                 | 0.63  | 0.37 | 0.01   | 0.08 | 0.02  | 0.02  | 0.01  | 0.01  | ND    | ND    | 0.11 | 3.42  | 9.50  |
| N-23    | 2.53                                                                 | 1.21  | 0.62 | 0.01   | 0.19 | 0.04  | 0.07  | 0.07  | 0.09  | 0.02  | 0.12  | 0.41 | 8.60  | 22.30 |
| N-24    | 0.85                                                                 | 0.47  | 0.27 | UD     | 0.17 | 0.01  | 0.05  | 0.03  | 0.02  | UD    | 0.04  | 0.33 | 3.00  | 29.14 |
| N-25    | 2.32                                                                 | 1.44  | 0.96 | 0.01   | 0.15 | 0.027 | 0.035 | 0.023 | 0.026 | 0.007 | 0.09  | 0.57 | 2.40  | 32.80 |
| N-26    | 3.51                                                                 | 1.18  | 1.33 | 0.025  | 0.15 | 0.063 | 0.076 | 0.099 | 0.073 | 0.046 | 0.123 | 0.38 | 6.13  | 13.27 |
| N-27    | 4.48                                                                 | 2.22  | 1.44 | 0.02   | 0.19 | 0.06  | 0.10  | 0.07  | 0.06  | 0.03  | ND    | 1.70 | 13.89 | 14.98 |
| N-28    | 1.36                                                                 | 0.44  | 0.49 | UD     | 0.09 | 0.02  | 0.03  | 0.02  | 0.01  | 0.01  | 0.05  | 0.19 | 4.11  | 7.63  |
| N-29    | 1.24                                                                 | 1.23  | 0.56 | 0.01   | 0.14 | ND    | 0.02  | 0.01  | 0.01  | 0.01  | 0.10  | 0.36 | 5.53  | 13.20 |
| N-30    | 2.61                                                                 | 0.82  | 0.46 | 0.011  | 0.14 | 0.04  | 0.02  | 0.04  | 0.01  | 0.01  | 0.09  | 0.58 | 5.06  | 17.69 |
| N-31    | 1.78                                                                 | 1.11  | 0.38 | 0.01   | 0.23 | 0.05  | 0.08  | 0.07  | 0.08  | 0.02  | 0.05  | 0.17 | 5.56  | 33.82 |
| N-32    | 3.39                                                                 | 1.35  | 0.74 | 0.017  | 0.18 | 0.05  | 0.07  | 0.119 | 0.063 | 0.034 | 0.16  | 0.81 | 7.98  | 23.84 |
| N-33    | 0.86                                                                 | 0.64  | 0.43 | 0.01   | 0.12 | 0.04  | 0.03  | 0.03  | 0.04  | ND    | ND    | 0.31 | 4.48  | 5.30  |
| N-34    | 1.40                                                                 | 0.80  | 0.60 | UD     | 0.10 | ND    | ND    | ND    | ND    | ND    | ND    | 0.30 | 2.00  | 5.00  |
| N-35    | 4.40                                                                 | 1.49  | 0.94 | 0.03   | 0.20 | 0.11  | 0.12  | 0.11  | 0.07  | ND    | ND    | 0.58 | 13.18 | 28.80 |
| N-36    | 3.41                                                                 | 2.00  | 1.47 | 0.02   | 0.23 | 0.061 | 0.101 | 0.066 | 0.045 | 0.031 | 0.16  | 1.30 | 8.52  | 16.15 |
| N-37    | 6.11                                                                 | 1.20  | 1.29 | 0.04   | 0.26 | 0.15  | 0.14  | 0.11  | 0.07  | 0.01  | 0.15  | 1.56 | 8.67  | 24.51 |
| N-38    | 1.64                                                                 | 1.49  | 0.36 | 0.01   | 0.20 | 0.07  | 0.08  | 0.07  | 0.08  | 0.01  | 0.04  | 0.08 | 6.51  | 40.63 |
| N-39    | 2.53                                                                 | 1.20  | 0.80 | 0.02   | 0.31 | 0.05  | 0.07  | 0.07  | 0.03  | 0.01  | 0.10  | 0.71 | 8.28  | 39.22 |
| N-40    | 4.05                                                                 | 1.47  | 0.76 | 0.05   | 0.34 | 0.22  | 0.24  | 0.28  | 0.17  | 0.01  | 0.07  | 0.84 | 12.41 | 30.54 |
| N-41    | 1.86                                                                 | 1.05  | 0.74 | 0.01   | 0.14 | 0.02  | 0.02  | 0.02  | 0.05  | 0.01  | 0.06  | 0.33 | 3.79  | 17.49 |
| N-42    | 2.69                                                                 | 1.33  | 0.64 | 0.02   | 0.26 | 0.10  | 0.08  | 0.11  | 0.08  | 0.02  | 0.04  | 0.19 | 7.30  | 38.20 |
| N-43    | 5.18                                                                 | 1.93  | 1.54 | 0.024  | 0.24 | 0.101 | 0.094 | 0.081 | 0.044 | 0.009 | 0.149 | 0.77 | 8.51  | 30.25 |

|      |      |      |      |       |      |       |       |       |       |       |       |      |       |       |
|------|------|------|------|-------|------|-------|-------|-------|-------|-------|-------|------|-------|-------|
| N-44 | 3.33 | 2.12 | 1.25 | 0.01  | 0.10 | 0.05  | 0.06  | 0.12  | 0.09  | 0.03  | 0.07  | 0.22 | 7.73  | 13.72 |
| N-45 | 3.86 | 1.40 | 1.01 | 0.02  | 0.23 | 0.09  | 0.10  | 0.11  | 0.09  | ND    | ND    | 0.56 | 11.81 | 11.20 |
| N-46 | 3.33 | 1.44 | 0.90 | 0.02  | 0.29 | 0.10  | 0.12  | 0.18  | 0.12  | 0.05  | 0.18  | 0.82 | 9.88  | 23.99 |
| N-47 | 2.64 | 1.27 | 0.70 | 0.013 | 0.13 | 0.045 | 0.054 | 0.077 | 0.06  | 0.017 | 0.077 | 0.67 | 5.70  | 20.45 |
| N-48 | 2.89 | 1.36 | 0.61 | 0.02  | 0.27 | 0.10  | 0.12  | 0.16  | 0.09  | ND    | ND    | 0.15 | 7.21  | 29.40 |
| N-49 | 2.80 | 1.64 | 1.04 | 0.009 | 0.14 | 0.04  | 0.07  | 0.06  | 0.04  | 0.02  | 0.05  | 0.15 | 3.81  | 9.16  |
| N-50 | 4.44 | 1.55 | 1.18 | 0.017 | 0.20 | 0.062 | 0.064 | 0.055 | 0.033 | 0.009 | 0.246 | 1.82 | 9.26  | 27.27 |
| N-51 | 1.19 | 1.12 | 0.45 | 0.01  | 0.19 | 0.05  | 0.06  | 0.05  | 0.04  | 0.01  | 0.03  | 0.15 | 5.20  | 25.30 |
| N-52 | 4.04 | 1.75 | 1.28 | 0.02  | 0.26 | 0.14  | 0.11  | 0.18  | 0.11  | 0.04  | 0.12  | 0.70 | 11.18 | 24.92 |
| N-53 | 2.74 | 0.96 | 0.59 | 0.015 | 0.11 | 0.06  | 0.04  | 0.05  | 0.03  | 0.02  | 0.14  | 0.38 | 8.18  | 11.51 |
| N-54 | 3.74 | 2.35 | 1.23 | 0.021 | 0.21 | 0.069 | 0.105 | 0.119 | 0.062 | 0.034 | 0.19  | 0.96 | 10.79 | 14.25 |
| N-55 | 3.11 | 1.39 | 0.95 | 0.01  | 0.17 | ND    | ND    | ND    | ND    | ND    | ND    | 0.67 | 5.42  | 21.31 |
| N-56 | 6.06 | 2.10 | 1.37 | 0.038 | 0.40 | 0.22  | 0.15  | 0.18  | 0.09  | 0.03  | 0.20  | 1.38 | 15.60 | 23.10 |
| N-57 | 2.58 | 1.97 | 0.79 | 0.01  | 0.26 | 0.01  | 0.04  | 0.03  | 0.03  | 0.01  | 0.15  | 0.71 | 10.68 | 40.68 |
| N-58 | 1.48 | 0.77 | 0.35 | 0.01  | 0.17 | 0.07  | 0.06  | 0.40  | 0.09  | 0.01  | 0.04  | 0.09 | 4.99  | 20.78 |
| N-59 | 3.08 | 1.19 | 0.66 | 0.014 | 0.19 | 0.066 | 0.071 | 0.058 | 0.044 | ND    | ND    | 0.42 | 5.62  | 32.26 |
| N-60 | 2.12 | 0.90 | 0.45 | 0.014 | 0.16 | 0.068 | 0.044 | 0.031 | 0.032 | 0.018 | 0.042 | 0.13 | 5.23  | 27.63 |
| N-61 | 6.79 | 2.55 | 1.68 | 0.02  | 0.36 | 0.23  | 0.19  | 0.17  | 0.12  | 0.04  | 0.17  | 2.13 | 16.30 | 28.27 |
| N-62 | 2.82 | 0.77 | 0.53 | 0.015 | 0.16 | 0.044 | 0.04  | 0.06  | 0.039 | 0.024 | 0.093 | 0.42 | 6.44  | 10.70 |
| N-63 | 9.67 | 3.72 | 2.30 | 0.033 | 0.45 | 0.139 | 0.209 | 0.153 | 0.081 | 0.073 | 0.278 | 1.49 | 28.82 | 33.26 |
| N-64 | 1.32 | 0.57 | 0.46 | 0.002 | 0.08 | 0.04  | 0.05  | 0.04  | 0.04  | 0.02  | 0.07  | 0.21 | 4.78  | 10.34 |
| N-65 | 3.78 | 1.73 | 1.16 | 0.015 | 0.28 | 0.07  | 0.07  | 0.06  | 0.05  | 0.04  | 0.36  | 0.77 | 11.84 | 28.06 |
| N-66 | 5.33 | 1.59 | 1.13 | 0.024 | 0.20 | 0.085 | 0.068 | 0.06  | 0.05  | 0.019 | 0.112 | 1.24 | 10.76 | 33.41 |
| N-67 | 4.21 | 2.17 | 0.89 | 0.03  | 0.23 | 0.08  | 0.07  | 0.07  | 0.06  | 0.05  | 0.20  | 0.58 | 13.84 | 14.53 |
| N-68 | 3.72 | 1.74 | 1.10 | 0.016 | 0.22 | 0.08  | 0.08  | 0.08  | 0.05  | 0.02  | 0.12  | 0.40 | 11.40 | 21.83 |
| N-69 | 1.59 | 1.09 | 0.41 | 0.01  | 0.17 | 0.08  | 0.12  | 0.12  | 0.08  | 0.02  | 0.08  | 0.14 | 4.78  | 21.00 |
| N-70 | 2.60 | 1.30 | 0.55 | 0.02  | 0.19 | 0.06  | 0.09  | 0.06  | 0.05  | 0.02  | 0.05  | 0.10 | 5.17  | 30.04 |
| S-02 | 3.94 | 0.96 | 0.85 | 0.024 | 0.23 | 0.07  | 0.08  | 0.10  | 0.06  | 0.03  | 0.16  | 1.02 | 15.20 | 18.50 |
| S-03 | 0.67 | 0.37 | 0.37 | 0.01  | 0.11 | 0.05  | 0.14  | 0.06  | 0.04  | 0.01  | 0.06  | 0.31 | 3.42  | 11.45 |
| S-04 | 0.65 | 0.57 | 0.29 | 0.01  | 0.11 | 0.03  | 0.17  | 0.10  | 0.06  | 0.03  | 0.12  | 0.45 | 8.23  | 20.00 |
| S-05 | 2.65 | 1.51 | 0.95 | 0.01  | 0.26 | 0.08  | 0.19  | 0.22  | 0.10  | 0.06  | 0.19  | 0.97 | 19.27 | 21.72 |
| S-06 | 1.35 | 0.78 | 0.36 | 0.008 | 0.13 | 0.07  | 0.11  | 0.10  | 0.07  | 0.02  | ND    | 1.52 | 10.42 | 10.76 |

Abbreviations: no data, ND; undetectable, UD.

Partial data for S-01, N-02, N-03, N-05, N-06, N-07, N-10, N-12, N-21, N-26, N-36, N-37, N-43, N-47, N-50, N-52, N-54, N-55, N-56, N-61, N-63, and N-66 were presented in a previous report [4].

Partial data for S-01, N-02, N-03, N-04, N-05, N-06, N-10, N-12, N-20, N-21, N-37, S-02, S-03, and S-04 were presented in a previous report [6].

\*Newborn screening for N-21 was conducted in a regional laboratory, and then the same dried blood sample was sent to the University of Fukui for reanalysis. The data of this patient, presented in previous reports [4, 6], were obtained in the reanalysis, but the data for C14:1, C12, C10, C8, C6, and C4 tests are not available at present. Therefore, the data for N-21 in this study are substituted with those obtained in the first analysis.
