# Supplementary material for: Newborn Screening with (C16 + C18:1)/C2 and C14/C3 for Carnitine Palmitoyltransferase II Deficiency throughout Japan Has Revealed C12/C0 as an Index of Higher Sensitivity and Specificity
Source: MDPI journal article supplement (doi:10.3390/ijns9040062), 2023-10-27
Supplement: s1 [file s1]

**Table S1.** Results of newborn screening (NBS) and confirmatory tests of the infants enrolled in this study.

| Case ID              | NBS Indices and Cutoff<br>(Mean ± SD of 99.9th Percentile<br>Values in 35 Laboratories) |                         | Serum<br>Acylcarnitine<br>Levels (nmol/mL) |       | CPT II<br>Activity<br>(%) <sup>1</sup> | CPT2 Genotype<br>(Rare Variants and Thermolabile Polymorphisms) |                         |                        |                        | Diagnoses of<br>NBS-Positive<br>Infants     |
|----------------------|-----------------------------------------------------------------------------------------|-------------------------|--------------------------------------------|-------|----------------------------------------|-----------------------------------------------------------------|-------------------------|------------------------|------------------------|---------------------------------------------|
|                      | (C16 + C18:1)/C2<br>0.432 ± 0.073                                                       | C14/C3<br>0.386 ± 0.077 | C16                                        | C18:1 |                                        | Variant 1                                                       | Variant 2               | c.1055T > G<br>p.F352C | c.1102G > A<br>p.V368I |                                             |
|                      |                                                                                         |                         |                                            |       |                                        |                                                                 |                         |                        |                        |                                             |
| NBS-positive infants |                                                                                         |                         |                                            |       |                                        |                                                                 |                         |                        |                        |                                             |
| S-01                 | 0.75                                                                                    | 0.86                    | 3.01                                       | 3.92  | 13.6                                   | c.1148T > A<br>p.F383Y                                          | c.481C > T<br>p.R161W   | F/C                    | V/I                    | Hypoglycemic<br>encephalopathy <sup>3</sup> |
| N-01                 | 2.108                                                                                   | 3.16                    | 1.60                                       | 1.48  | 1.2                                    | c.1148T > A<br>p.F383Y                                          | c.1148T > A<br>p.F383Y  | C/C                    | I/I                    | Patient                                     |
| N-02                 | 3.26                                                                                    | 4.26                    | 3.02                                       | 3.21  | 3.3 <sup>2</sup>                       | c.520G > A<br>p.E174K                                           | c.1148T > A<br>p.F383Y  |                        | ND                     | Patient                                     |
| N-03                 | 1.40                                                                                    | 3.18                    | 2.17                                       | 2.41  | 3.3 <sup>2</sup>                       | c.520G > A<br>p.E174K                                           | c.1148T > A<br>p. F383Y |                        | ND                     | Patient                                     |
| N-04                 | 1.14                                                                                    | 2.20                    | 0.84                                       | 0.61  | 4.1                                    | c.520G > A<br>p.E174K                                           | c.656G > A<br>p.R219Q   | F/C                    | V/I                    | Patient                                     |
| N-05                 | 1.65                                                                                    | 4.56                    | 1.57                                       | 1.32  | 4.4 <sup>2</sup>                       | c.1148T > A<br>p.F383Y                                          | c.1429C > T<br>p.R477W  |                        | ND                     | Patient                                     |
| N-06                 | 1.10                                                                                    | 1.72                    | 0.65                                       | 0.88  | 4.4 <sup>2</sup>                       | c.1511C > T<br>p.P504L                                          | c.1813G > C<br>p.V605L  | F/C                    | V/I                    | Patient                                     |
| N-07                 | 3.44                                                                                    | 5.65                    | 3.18                                       | 2.54  | 4.8 <sup>2</sup>                       | c.451C > T<br>p.R151W                                           | c.1148T > A<br>p. F383Y | F/C                    | I/I                    | Patient                                     |
| N-08                 | 0.47                                                                                    | 0.69                    | 0.32                                       | 0.28  | 6.4                                    | c.214_215delTT<br>p.L72Efs                                      | c.1891C > T<br>p.R631C  | F/C                    | V/I                    | Patient                                     |
| N-09                 | 1.31                                                                                    | 1.12                    | 2.25                                       | 2.37  | 7.5                                    | c.520G > A<br>p.E174K                                           | c.1148T > A<br>p.F383Y  | F/C                    | V/I                    | Patient                                     |
| N-10                 | 3.01                                                                                    | ND                      | 3.06                                       | 4.24  | 7.8                                    | c.1121G > A<br>p.W374*                                          | c.1148T > A<br>p.F383Y  | F/C                    | V/I                    | Patient                                     |
| N-11                 | 0.86                                                                                    | 0.93                    | 0.83                                       | 2.15  | 8.7                                    | c.1115A > G<br>p.H372R                                          | c.1508G > A<br>p.R503H  | F/C                    | I/I                    | Patient                                     |
| N-12                 | 3.27                                                                                    | 8.25                    | 1.47                                       | 2.46  | 12.1                                   | c.1148T > A<br>p.F383Y                                          | c.1148T > A<br>p.F383Y  | C/C                    | I/I                    | Patient                                     |
| N-13                 | 0.55                                                                                    | 1.00                    | 0.61                                       | 0.87  | 12.4                                   | c.1492C > T<br>p.R498C                                          | c.1813G > C<br>p.V605L  | C/C                    | I/I                    | Patient                                     |
| N-14                 | 6.31                                                                                    | 4.89                    | 5.65                                       | 5.00  | 13.4                                   | c.520G > A<br>p.E174K                                           | c.1737delC<br>p.Y579*   | F/F                    | V/V                    | Patient                                     |
| N-15                 | 4.60                                                                                    | 8.39                    | ND                                         | ND    | 14.2                                   | c.520G > A<br>p.E174K                                           | c.1737delC<br>p.Y579*   | F/F                    | V/V                    | Patient                                     |
| N-16                 | 0.56                                                                                    | 1.01                    | 0.68                                       | 0.82  | 15.8                                   | c.520G > A<br>p.E174K                                           | c.1813G > C<br>p.V605L  | F/C                    | V/I                    | Patient                                     |
| N-17                 | 0.87                                                                                    | 1.75                    | 2.29                                       | 3.00  | 16.5                                   | c.1148T > A<br>p.F383Y                                          | c.1148T > A<br>p.F383Y  | C/C                    | I/I                    | Patient                                     |
| N-18                 | 0.50                                                                                    | 0.98                    | 0.41                                       | 0.33  | 19.9                                   | c.520G > A<br>p.E174K                                           | c.1813G > C<br>p.V605L  | F/C                    | V/I                    | Patient                                     |
| N-19                 | 0.87                                                                                    | 1.26                    | 0.70                                       | 0.57  | 20.7                                   | c.106C > T<br>p.Q36*                                            | c.1813G > C<br>p.V605L  | C/C                    | V/V                    | Patient                                     |
| N-20                 | 0.67                                                                                    | 1.58                    | 1.70                                       | 1.70  | 27.9                                   | c.520G > A<br>p.E174K                                           | c.1813G > C<br>p.V605L  | F/C                    | V/I                    | Patient                                     |
| N-21                 | 0.51                                                                                    | 0.40                    | 0.23                                       | 0.25  | 31.8                                   | c.1525A > G<br>p.T509A                                          | None                    | F/C                    | I/I                    | Heterozygous<br>carrier                     |
| N-22                 | 0.52                                                                                    | 0.69                    | 0.18                                       | 0.20  | 34.0                                   | None                                                            | None                    | C/C                    | I/I                    | p.F352C<br>homozygote                       |
| N-23                 | 0.44                                                                                    | 0.45                    | 0.17                                       | 0.12  | 37.7                                   |                                                                 | Not analyzed            |                        |                        | Heterozygous<br>carrier?                    |
| N-24                 | 0.44                                                                                    | 0.52                    | 0.17                                       | 0.28  | 44.3                                   | None                                                            | None                    | F/C                    | V/I                    | Normal?                                     |
| N-25                 | 1.54                                                                                    | 0.26                    | 0.07                                       | 0.08  | 51.3                                   | None                                                            | None                    | F/F                    | V/I                    | Normal?                                     |
| N-26                 | 0.77                                                                                    | 0.39                    | 0.29                                       | 0.15  | 52.0 <sup>2</sup>                      | None                                                            | None                    | C/C                    | I/I                    | p.F352C<br>homozygote                       |
| N-27                 | 0.48                                                                                    | 0.12                    | 0.13                                       | 0.17  | 52.0                                   | None                                                            | None                    | F/F                    | I/I                    | Normal?                                     |
| N-28                 | 0.44                                                                                    | 0.47                    | 0.15                                       | 0.16  | 53.0                                   | None                                                            | None                    | F/C                    | V/V                    | Normal?                                     |
| N-29                 | 0.45                                                                                    | 0.39                    | 0.09                                       | 0.10  | 53.6                                   |                                                                 | Not analyzed            |                        |                        | Heterozygous<br>carrier?                    |
| N-30                 | 0.68                                                                                    | 0.25                    | 0.10                                       | 0.09  | 54.8                                   |                                                                 | Not analyzed            |                        |                        | Heterozygous<br>carrier?                    |
| N-31                 | 0.52                                                                                    | 1.35                    | ND                                         | ND    | 58.8                                   |                                                                 | Not analyzed            |                        |                        | Heterozygous<br>carrier?                    |
| N-32                 | 0.59                                                                                    | 0.23                    | 0.09                                       | 0.10  | 59.1                                   |                                                                 | Not analyzed            |                        |                        | Heterozygous<br>carrier?                    |
| N-33                 | 0.34                                                                                    | 0.40                    | 0.21                                       | 0.27  | 59.9                                   |                                                                 | Not analyzed            |                        |                        | Heterozygous<br>carrier?                    |
| N-34                 | 1.21                                                                                    | 0.54                    | 0.06                                       | 0.21  | 63.6                                   |                                                                 | Not analyzed            |                        |                        | Heterozygous<br>carrier?                    |
| N-35                 | 0.45                                                                                    | 0.35                    | 0.19                                       | 0.19  | 63.8                                   | None                                                            | None                    | C/C                    | V/V                    | p.F352C<br>homozygote                       |
| N-36                 | 0.64                                                                                    | 0.18                    | 0.17                                       | 0.24  | 67.4 <sup>2</sup>                      | None                                                            | None                    | F/C                    | I/I                    | Normal?                                     |
| N-37                 | 0.84                                                                                    | 0.17                    | 0.17                                       | 0.06  | 70.8                                   | c.1634A > C<br>p.E545A                                          | None                    | F/F                    | V/I                    | Heterozygous<br>carrier                     |
| N-38                 | 0.48                                                                                    | 2.50                    | 0.10                                       | 0.09  | 78.1                                   |                                                                 | Not analyzed            |                        |                        | Normal                                      |

|                                              |      |      |      |      |                    |                        |                        |     |     |                  |
|----------------------------------------------|------|------|------|------|--------------------|------------------------|------------------------|-----|-----|------------------|
| N-39                                         | 0.45 | 0.44 | 0.10 | 0.35 | 92.6               | None                   | None                   | F/F | V/V | Normal           |
| N-40                                         | 0.45 | 0.41 | 0.08 | 0.22 | 93.0               | Not analyzed           |                        |     |     | Normal           |
| N-41                                         | 0.77 | 0.42 | 0.04 | 0.09 | 95.8               | Not analyzed           |                        |     |     | Normal           |
| N-42                                         | 0.55 | 1.40 | 0.13 | 0.17 | 98.0               | None                   | None                   | F/F | V/V | Normal           |
| N-43                                         | 0.84 | 0.37 | 0.09 | 0.07 | 99.3 <sup>2</sup>  | None                   | None                   | F/C | I/I | Normal           |
| N-44                                         | 0.70 | 0.46 | 0.17 | 0.16 | 100.0 <sup>2</sup> | None                   | None                   | F/F | V/V | Normal           |
| N-45                                         | 0.45 | 0.41 | 0.06 | 0.12 | 101.4              | Not analyzed           |                        |     |     | Normal           |
| N-46                                         | 0.48 | 0.36 | 0.09 | 0.05 | 102.4              | Not analyzed           |                        |     |     | Normal           |
| N-47                                         | 0.69 | 0.19 | ND   | ND   | 108.1              | Not analyzed           |                        |     |     | Normal           |
| N-48                                         | 0.59 | 1.83 | 0.23 | 0.07 | 109.1              | None                   | None                   | F/F | V/I | Normal           |
| N-49                                         | 1.10 | 0.92 | 0.08 | 0.09 | 109.2              | None                   | None                   | F/F | I/I | Normal           |
| N-50                                         | 0.65 | 0.11 | 0.09 | 0.09 | 113.9 <sup>2</sup> | None                   | None                   | F/C | I/I | Normal           |
| N-51                                         | 0.45 | 1.24 | 0.22 | 0.21 | 116.8              | None                   | None                   | F/C | I/I | Normal           |
| N-52                                         | 0.52 | 0.37 | 0.16 | 0.13 | 116.9              | Not analyzed           |                        |     |     | Normal           |
| N-53                                         | 0.45 | 0.39 | 0.10 | 0.08 | 120.1              | Not analyzed           |                        |     |     | Normal           |
| N-54                                         | 0.57 | 0.22 | ND   | ND   | 122.0              | Not analyzed           |                        |     |     | Normal           |
| N-55                                         | 0.83 | 0.25 | 0.09 | 0.12 | 126.0 <sup>2</sup> | Not analyzed           |                        |     |     | Normal           |
| N-56                                         | 0.52 | 0.29 | 0.06 | 0.06 | 128.0              | Not analyzed           |                        |     |     | Normal           |
| N-57                                         | 0.43 | 0.37 | 0.19 | 0.14 | 132.5              | Not analyzed           |                        |     |     | Normal           |
| N-58                                         | 0.45 | 1.89 | 0.15 | 0.11 | 141.2              | Not analyzed           |                        |     |     | Normal           |
| N-59                                         | 0.76 | 0.44 | 0.08 | 0.05 | 144.0              | None                   | None                   | F/F | I/I | Normal           |
| N-60                                         | 0.58 | 1.22 | 0.08 | 0.09 | 144.3              | None                   | None                   | F/F | V/I | Normal           |
| N-61                                         | 0.57 | 0.17 | 0.09 | 0.05 | 152.7              | Not analyzed           |                        |     |     | Normal           |
| N-62                                         | 0.56 | 0.38 | 0.09 | 0.10 | 153.7              | Not analyzed           |                        |     |     | Normal           |
| N-63                                         | 0.46 | 0.30 | 0.11 | 0.10 | 153.9 <sup>2</sup> | None                   | None                   | F/C | I/I | Normal           |
| N-64                                         | 0.40 | 0.38 | 0.06 | 0.03 | 156.6              | Not analyzed           |                        |     |     | Normal           |
| N-65                                         | 0.46 | 0.37 | ND   | ND   | 167.7              | Not analyzed           |                        |     |     | Normal           |
| N-66                                         | 0.64 | 0.19 | 0.09 | 0.11 | 195.6 <sup>2</sup> | Not analyzed           |                        |     |     | Normal           |
| N-67                                         | 0.46 | 0.39 | 0.17 | 0.15 | 258.6              | None                   | None                   | F/F | V/I | Normal           |
| N-68                                         | 0.48 | 0.55 | 0.15 | 0.11 | 266.3              | Not analyzed           |                        |     |     | Normal           |
| N-69                                         | 0.56 | 1.27 | 0.05 | 0.05 | 389.2              | Not analyzed           |                        |     |     | Normal           |
| N-70                                         | 0.76 | 2.01 | 0.08 | 0.06 | 410.4              | Not analyzed           |                        |     |     | Normal           |
| Infants with symptoms but normal NBS results |      |      |      |      |                    |                        |                        |     |     | Clinical symptom |
| S-02                                         | 0.32 | 0.22 | 0.64 | 0.71 | 8.1                | c.338C > T<br>p.S113L  | c.1933G > T<br>p.E645* | F/C | V/I | Rhabdomyolysis   |
| S-03                                         | 0.31 | 0.36 | 0.69 | 0.65 | 15.5               | c.1678C > T<br>p.R560W | c.1813G > C<br>p.V605L | C/C | I/I | Rhabdomyolysis   |
| S-04                                         | 0.15 | 0.24 | 1.17 | 1.88 | 16.2               | c.1148T > A<br>p.F383Y | c.1678C > T<br>p.R560W | C/C | I/I | Rhabdomyolysis   |
| S-05                                         | 0.22 | 0.27 | 0.95 | 1.27 | 19.0               | Not analyzed           |                        |     |     | Rhabdomyolysis   |
| S-06                                         | 0.20 | 0.09 | 1.74 | 2.40 | 30.2               | c.365C > T<br>p.S122F  | c.520G > A<br>p.E174K  | F/F | V/V | Rhabdomyolysis   |

Abbreviations: carnitine palmitoyltransferase II, CPT II; no data, ND; homozygous for p.F352C C/C; heterozygous for p.F352C, F/C; homozygous for p.F352, F/F; homozygous for p.V368I, I/I; heterozygous for p.V368I, V/I; homozygous for p.V368, V/V.

Partial data for S-01, N-02, N-03, N-05, N-06, N-07, N-10, N-12, N-21, N-26, N-36, N-37, N-43, N-47, N-50, N-52, N-54, N-55, N-56, N-61, N-63, and N-66 were presented in a previous report [4].

Partial data for S-01, N-02, N-03, N-04, N-05, N-06, N-10, N-12, N-20, N-21, N-37, S-02, S-03, and S-04 were presented in a previous report [6].

<sup>1</sup> Mean reference value of CPT II activity in 85 normal controls is 126.7 ± 43.2 pmol/min/10<sup>5</sup> lymphocytes.

<sup>2</sup> CPT II activity is calculated from d<sub>27</sub>C14/d<sub>31</sub>C16 in fatty acid oxidation assay: mean reference value in 36 normal controls is 0.273 ± 0.096.

<sup>3</sup> S-01 was a patient with symptoms who had passed our pilot NBS with C16 and C18:1; his data one reason to adopt (C16 + C18:1)/C2.
