# Supplementary material for: Newborn Screening with (C16 + C18:1)/C2 and C14/C3 for Carnitine Palmitoyltransferase II Deficiency throughout Japan Has Revealed C12/C0 as an Index of Higher Sensitivity and Specificity
Source: MDPI journal article supplement (doi:10.3390/ijns9040062), 2023-10-27
Supplement: s1 [file s1]

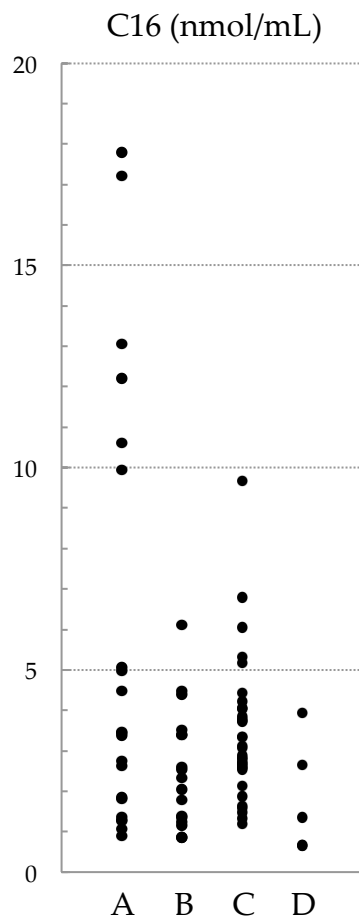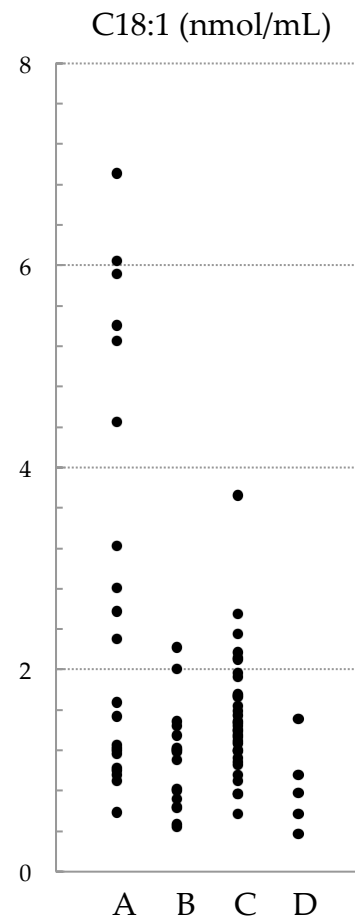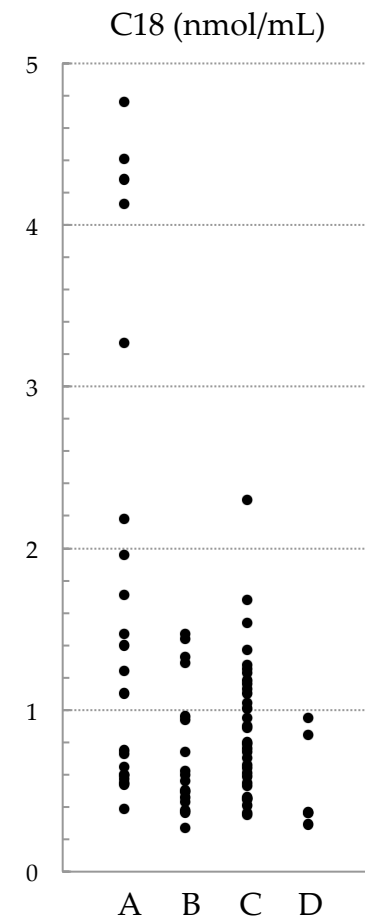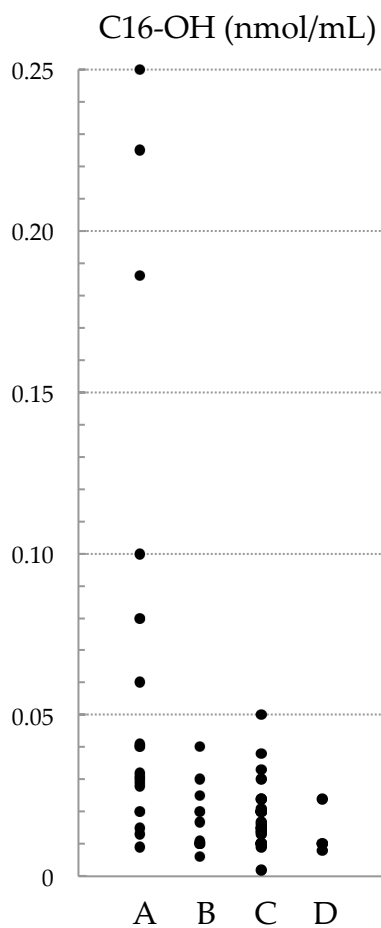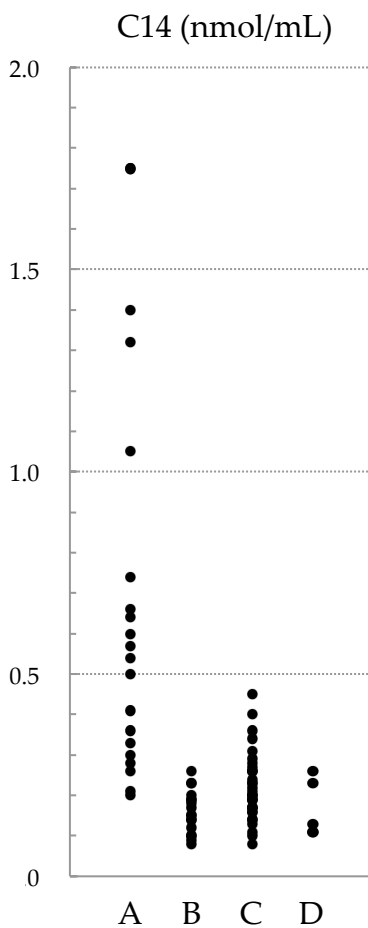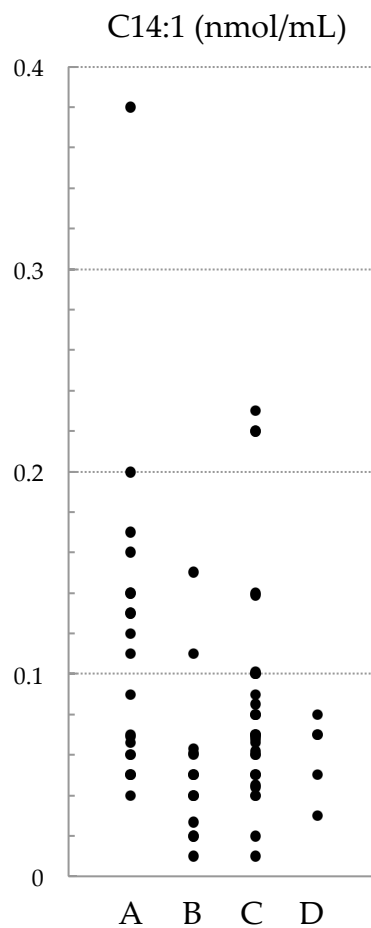

C12 (nmol/mL)

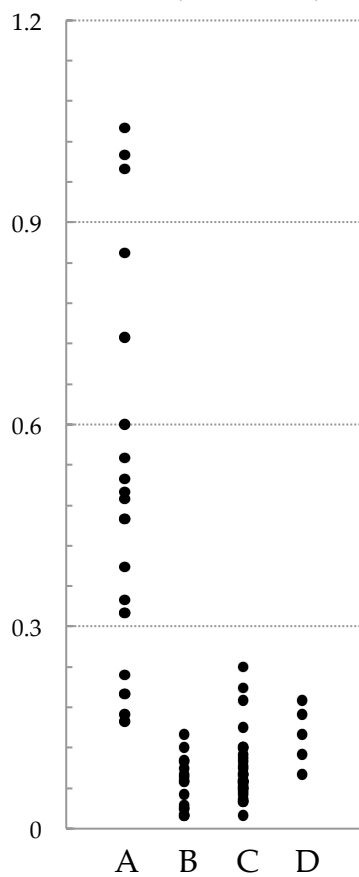

C10 (nmol/mL)

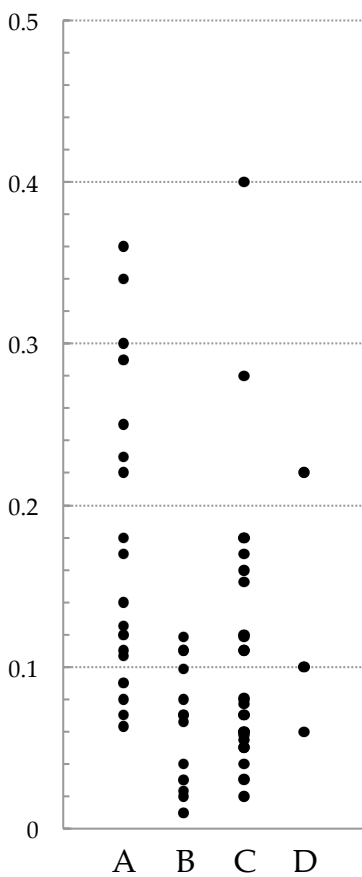

C8 (nmol/mL)

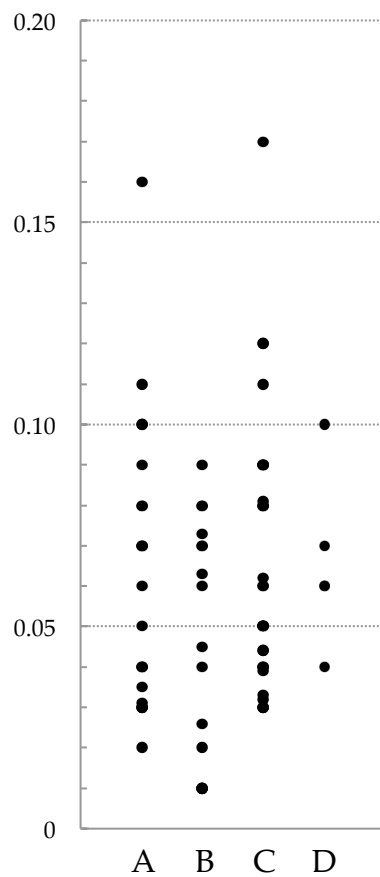

C6 (nmol/mL)

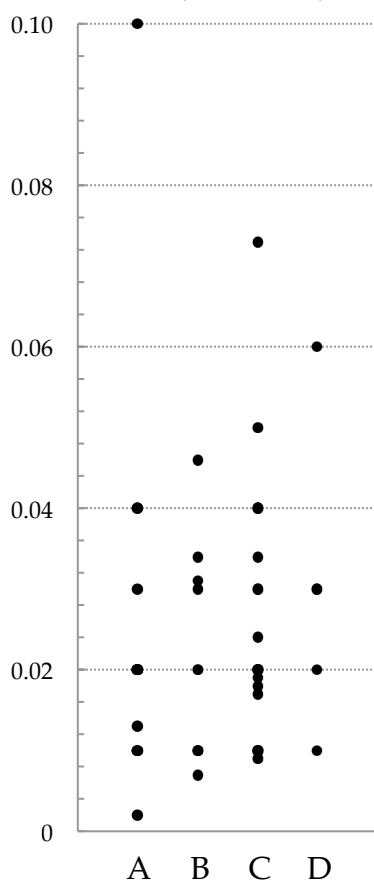

C4 (nmol/mL)

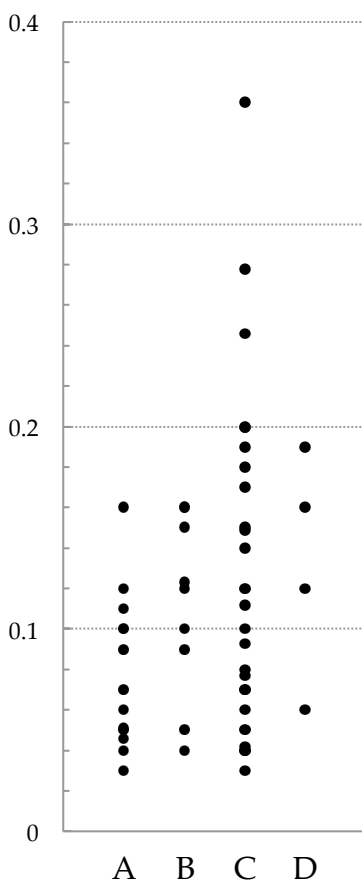

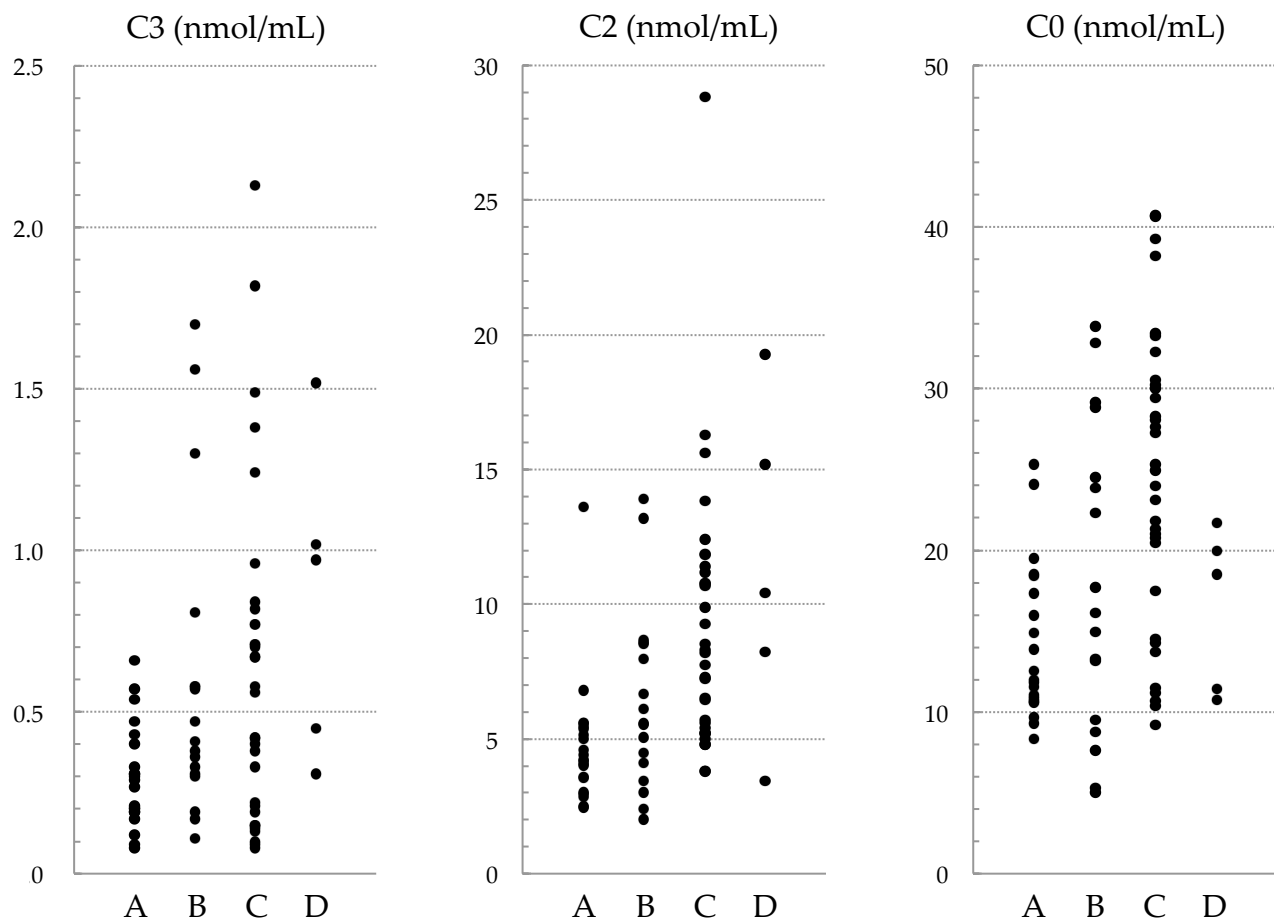

**Figure S1.** Concentrations of acylcarnitines and free carnitine (C0) in dried blood specimens from newborns. A–C: Newborn screening (NBS)–positive infants (A: patients with carnitine palmitoyltransferase (CPT) II deficiency; B: carriers heterozygous for pathogenic variants, infants homozygous for p.F352C, and other infants with carrier-level CPT II activity; and C: infants with normal-level CPT II activity). D: Patients with symptoms but normal NBS results.
